# Supplementary material for: The Golden Activity of Lysinibacillus sphaericus: New Insights on Gold Accumulation and Possible Nanoparticles Biosynthesis
Source: MDPI journal article supplement (doi:10.3390/ma11091587), 2018-09-02
Supplement: s1 [file s1]

# Supplementary Materials:

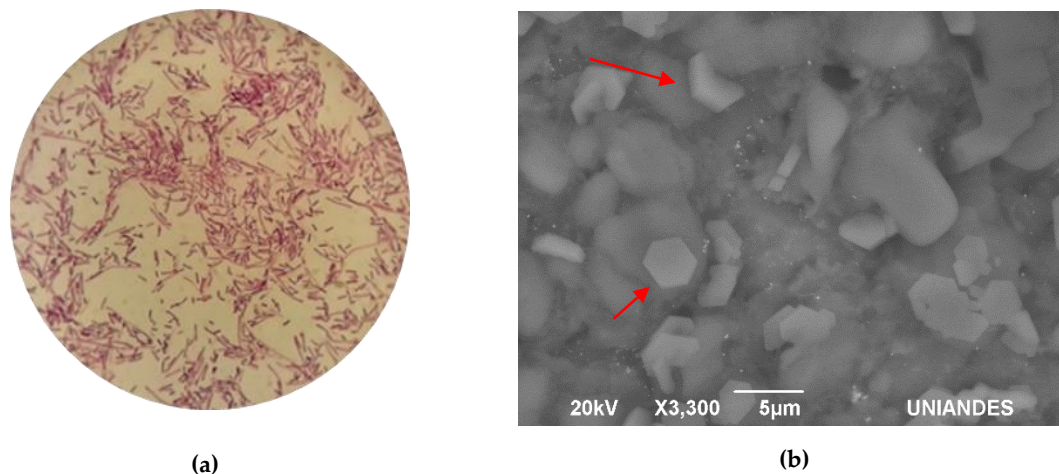

**Figure S1:** Image of optic microscope 100x of (a) strain MCB2 showing different stages of sporulation cycle. Additionally, (b) SEM observation of crystal protein during sporulation of the mix between *L. sphaericus* MCB1 and MCB2.

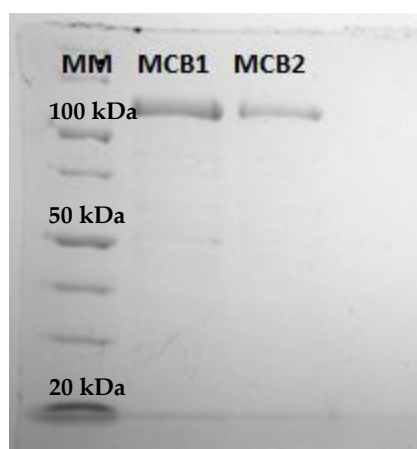

**Figure S2:** SDS-PAGE gel of S-layer purification in MCB1 and MCB2

**Table S1:** Mortality bioassays with *L. sphaericus* on larvae of *Culex quinquefasciatus* and *Aedes aegypti*. Experiments were carried out in triplicate and the control was only with the larvae, while *L. sphaericus* strain 2362 was use as positive control.

| Treatment | 24 hours                   |                   | 48 hours                   |                   |
|-----------|----------------------------|-------------------|----------------------------|-------------------|
|           | <i>C. quinquefasciatus</i> | <i>A. aegypti</i> | <i>C. quinquefasciatus</i> | <i>A. aegypti</i> |
| Control   | 0 ± 0,000                  | 1 ± 1,527         | 5 ± 1,000                  | 1 ± 1,000         |
| 2362      | 18 ± 0,577                 | 1 ± 0,577         | 18 ± 0,000                 | 5 ± 1,154         |
| MCB1      | 18 ± 1,732                 | 5 ± 1,732         | 19 ± 1,154                 | 7 ± 1,527         |
| MCB2      | 1 ± 0,577                  | 1 ± 0,577         | 16 ± 0,577                 | 3 ± 2,309         |
